# Supplementary material for: Anisotropic optical and conductive properties of oriented 1D-nanoparticle thin films made by spray-assisted self-assembly
Source: Royal Society of Chemistry journal article supplement (doi:10.1039/c6fd00017g), 2016-01-01
Supplement: c6fd00017g1.pdf [file c6fd00017g1.pdf]

Supporting information

Anisotropic optical and conductive properties of oriented  
1D-nanoparticle thin films made by spray-assisted self-assembly

*S. Sekar,<sup>a,b</sup> V. Lemaire,<sup>a,b</sup> H. Hu,<sup>a,b</sup> G. Decher<sup>a,b,c,d\*</sup> and M. Pauly<sup>a,b\*</sup>*

<sup>a</sup> *Institut Charles Sadron, CNRS (UPR22), 23 rue du Loess, F-67034 Strasbourg, France*

<sup>b</sup> *Faculté de Chimie, Université de Strasbourg, 1 rue Blaise Pascal, F-67008 Strasbourg, France*

<sup>c</sup> *International Center for Frontier Research in Chemistry, 8 allée Gaspard Monge, F-67083 Strasbourg, France*

<sup>d</sup> *Excellence Cluster "Nanostructures in Interaction with their Environment" (LabEx NIE), 23 rue du Loess, F-67034 Strasbourg, France.*

Corresponding authors email: [matthias.pauly@ics-cnrs.unistra.fr](mailto:matthias.pauly@ics-cnrs.unistra.fr); [decher@unistra.fr](mailto:decher@unistra.fr)

## S-1/ Quartz Crystal Microbalance Study of AuNRs adsorption

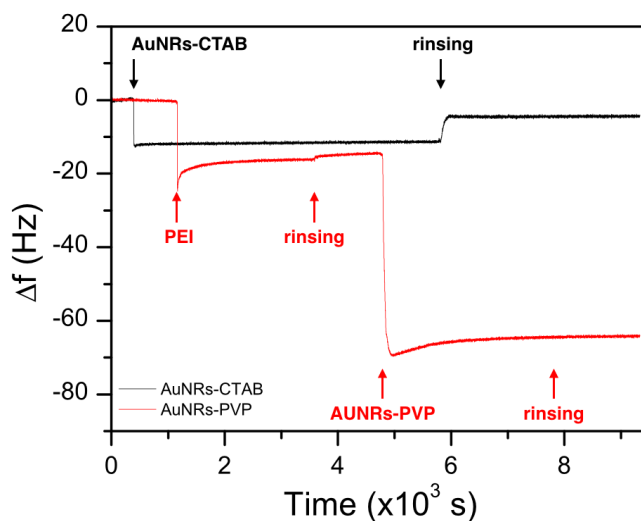

**Fig. S1:** frequency variation of the 5<sup>th</sup> overtone measured by Quartz Crystal Microbalance on AuNRs before (black) and after (red) coating with PVP.

Figure S1 shows the adsorption isotherm of native CTAB and PVP coated LAuNRs (AR  $\sim 16$ ) on a gold-coated sensor. The injection of the cationic CTAB-bilayer stabilized gold nanorods (AuNRs-CTAB) on a plasma activated sensor is associated with a decrease in the resonance frequency (black curve), which indicates the adsorption of CTAB coated AuNRs. The increasing frequency while rinsing with water suggests the removal of adsorbed moieties. For AuNRs-PVP adsorption, a monolayer of cationic PEI was first deposited on the plasma-activated crystal followed by rinsing with water. A rapid frequency shift evidences the fast adsorption kinetics of AuNRs-PVP on PEI. In contrast to AuNRs-CTAB, rinsing with water showed only the removal of loosely bound rods with a negligible shift, suggesting the strong adsorption of PVP-coated rods on the PEI-modified substrate.

S-II/ TEM of AuNRs-PVP

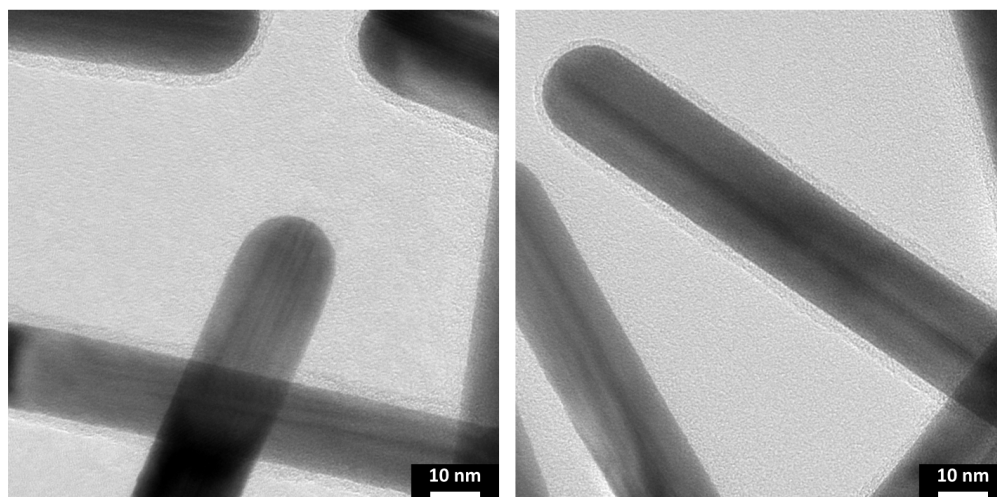

*Fig. S2: TEM pictures of PVP-coated L AuNRs.*
